# Supplementary material for: Various facets of intermolecular transfer of phase coherence by nuclear dipolar fields
Source: Copernicus journal article supplement (doi:10.5194/mr-2023-11), 2023-08-22
Supplement: Supplementary file 1 [file mr-2023-11-supplement.pdf]

# Supporting information:

## Various facets of intermolecular transfer of phase coherence by nuclear dipolar fields

Philippe Pelupessy<sup>1</sup>

<sup>1</sup>Laboratoire des Biomolécules, LBM, Département de Chimie, École Normale Supérieure, PSL University, Sorbonne Université, CNRS, 75005 Paris, France

**Correspondence:** Philippe Pelupessy (philippe.pelupessy@ens.psl.eu)

### Contents

Supporting information. Two additional figures and simulation program.

|                                                             |     |
|-------------------------------------------------------------|-----|
| – Figure SI1) Simulations GARP .....                        | 2   |
| – Figure SI2) Short experiment in inhomogeneous field ..... | 2   |
| – Code simulation program (parameter file) .....            | 3   |
| – Code simulation program (main) .....                      | 4-8 |

## Figures

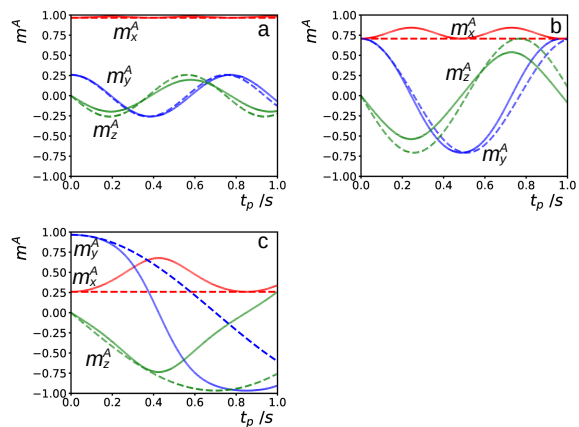

**Figure SI1.** Same as fig. 1a-c in the main text, except that the rf pulse-train was GARP instead of DIPSI-2. All other conditions for the simulations were identical.

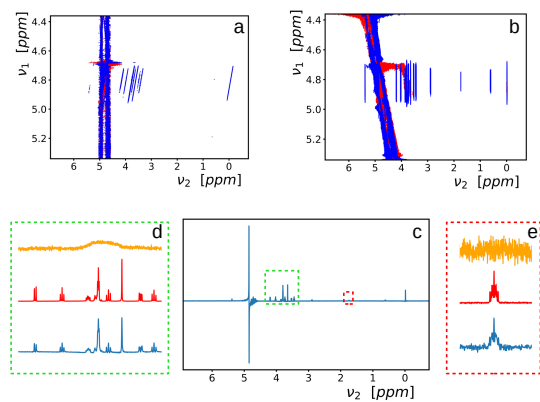

**Figure SI2.** Results of an experiment similar to the one of fig. 3 of the main text. The sole differences were a repetition time of about 3 s instead of 11 s, and 1 scan per increment instead of 4. This results in an experimental time of about 25 min. instead of 6 hours.

## Program

```
1: '''
2: modified: 21-07-2023
3: Parameter file for simul_df_tocsy_01.py
5 4:   For fig. 1d use:
6:     iniDSS = "zed"
7:     vDF = 1.84
8:     order = [-1, 1]
9:     we look at the 'planeabs' results
10 9:   For fig. 5b use:
11:     iniDSS = "MH2O"
12:     vDF = 1.84 or -0.5*1.84
13:     order = [2]
14:     we look at the 'zabs' results
15 14: '''
16: B0 = -800.13      # main field (minus sign for positif gyrom.)
17: vDSS = -4.85     # chemical shift difference wr H2O (ppm)
18: vDF = 1.84       # amplitude dipolar field
19: mixing = "Dipsi2" # "Dipsi2", "Garp", "cw" or "Waltz16"
20: tau90 = 30.e-6   # duration 90 pulse, defines rf power mixing
21: maxcyc = 120     # maximum number of mixing cycles
22:
23: ngrid = 36       # number of equidistant (in angles) gridpoints for
24:                 # the dephased solvent magnetization (MH2O)
25 25: iniDSS = "MH2O" # "iks", "why", "zed" or "MH2O"
26:                 # MH2O is initially dephased in the plane, MDSS (the solute
27:                 # magnetization) can be along one of the axis or initially
28:                 # aligned with MH2O
29: order = [2]      # indicates the ratio between the pfg before acquisition
30:                 # and the dephasing pfg
31: plot = True
32: plotopt = {'plane':False, 'planeabs':True, 'z':False, 'zabs':True}
33:           # 'zed' plots the magnetization in the plane after:
34:           # pfg-mixing-spoiling-90-pfg*order
35:           # 'plane' plots the magnetization in the plane after:
36:           # pfg-mixing-pfg*order
37: plotcol = ['blue', 'red', 'green', 'orange', 'cyan']
40 38: savedata = False
```

```

1: '''
2: modified: 21-07-2023
3: Simulation program transfer of phase coherence from abundant spins (H2O)
45 4: to solute (DSS) by dipolar field during TOCSY.
5: Only with mixing sequences along one axes with constant rf amplitude.
6: The solvent magnetization evolves as described in the main article.
7:
8: Program uses numba for jit compilation. Uses para02.py file for parameters
50 9: so that numba can use cache.
10:
11: The program has been run with versions:
12:
13: Python      3.11.3
55 14: Numpy      1.25.1
15: Numba       0.57.1
16: Matplotlib 3.7.2
17:
18: This code is provided for the purpose of checking and/or reproducing the
60 19: simulations of the main article and comes without any warranty. If you use
20: (part of) this code for your own work, please cite the original publication.
21:
22: 2023 Philippe Pelupessy
23: '''
65 24:
25: # Import necessary libraries
26: import numpy as np
27: import matplotlib.pyplot as plt
28: from numba import njit,prange
70 29: import para02 as pa #import parameter file
30: import importlib
31: importlib.reload(pa) #reload parameter file, needed if rerun from ipython
32:
33: # Evolution of the solute magnetization
75 34: @njit(parallel=True,cache = True,fastmath=True)
35: def evolveDSS (MDSS,ngrid,maxcyc,MH2O,SupCyc,Angle,Phase,
36:               IA,sA,cA,rfA,wDSS,lA,lS,unit) :
37:     '''Rotation around an axis during spinlock sequence along the x-axis. The
38:         axis of rotation for DSS is determined by the rf field and by the MH2O.
80 39:         RF power is constant but sign may alternate. On-resonance for abundant
40:         solvent spins, while magnetization of the off-resonant sparse spins is
41:         calculated. Optimized for numba just in time compilation. Gains in speed
42:         using fastmath=True depend strongly on computer.'''
43:     pil = np.pi/(180*unit)

```

```

85 44: for i in prange(ngrid): #loop over all sample positions
45:     mxm,mym,mzm = MDSS[0,i,0],MDSS[1,i,0],MDSS[2,i,0] #initial MDSS
46:     c = 0
47:     for k in range(maxcyc):
48:         X,Y,Z = MH2O[0,i,k],MH2O[1,i,k],MH2O[2,i,k] #precalculated MH2O
90 49:         #at beginning of each super-cycle. Very little difference if one
50:         #takes average of k and k+1.
51:         for l in range(1S): #loop 'supercycle'
52:             for m in range(1A): #loop 'subcycle'
53:                 sig = Phase[m]*SupCyc[l] #sign rf
95 54:                 Xs,Ys,Zs = rfA*sig-0.5*(IA*X),Y*sig,Z*sig
55:                 for n in range(Angle[m]): #loop over points in one pulse
56:                     x = Xs #x-field felt by DSS
57:                     y = -0.5*(cA[n]*Y-sA[n]*Zs) #y field
58:                     z = wDSS+(cA[n]*Z+sA[n]*Ys) #z field
100 59:                     theta = np.sqrt(x**2+y**2+z**2) #the rest in loop serves
60:                     #to calculate the rotation of DSS
61:                     a,t = np.cos(theta*0.5),-np.sin(theta*0.5)/theta
62:                     at2,t2 = 2*a*t,t*t
63:                     a2 = a*a
105 64:                     b2,c2,d2 = t2*x*x,t2*y*y,t2*z*z
65:                     ab,ac,ad = at2*x,at2*y,at2*z
66:                     bc,bd = 2*t2*x*y,2*t2*x*z
67:                     cd = 2*t2*y*z
68:                     mxp = (a2+b2-c2-d2)*mxm+(bc+ad)*mym+(bd-ac)*mzm
110 69:                     myp = (bc-ad)*mxm+(a2-b2+c2-d2)*mym+(ab+cd)*mzm
70:                     mzp = (bd+ac)*mxm+(cd-ab)*mym+(a2-b2-c2+d2)*mzm
71:                     mxm,mym,mzm = mxp,my,mzp
72:                     Ap = Angle[m]*pil*sig
73:                     Y,Z = np.cos(Ap)*Y-np.sin(Ap)*Z,np.cos(Ap)*Z+np.sin(Ap)*Y #
115 74:                     #update MH2O after each rf pulse (purely driven by rf)
75:                     c += Angle[m]
76:                     MDSS[0,i,k+1],MDSS[1,i,k+1],MDSS[2,i,k+1] = mxp,my,mzp #store MDSS
77:                     #after each cycle
78: return MDSS
120 79:
80:
81:
82: def main():
83:     B0 = pa.B0 #main field (minus sign for positive gyrom.)
125 84:     vDSS = pa.vDSS #chemical shift difference with H2O (ppm)
85:     mixing = pa.mixing #spin-lock seq. "Dipsi2","Garp","cw" or "Waltz16"
86:     tau90 = pa.tau90 #duration 90 pulse spinlock
87:     maxcyc = pa.maxcyc #maximum number of cycles spin-lock

```

```

88: ngrid = pa.ngrid      #H20 magnetization is phasemodulated number of phases
130 89: wDF = 2*np.pi*pa.vDF #dipolar field amplitude
90: iniDSS = pa.iniDSS   #inital DSS magn. "iks", "why", "zed" or "MH2O"
91:
92: order = pa.order     #lists of initial orders, SQ, DQ, TQ...(+ or -)
93: plot = pa.plot       #True or False
135 94: plotopt = pa.plotopt #Dictionary of plotoptions (True or False):
95:     #plane, planeabs,z, zabs
96: plotcol = pa.plotcol #colors plot (each order has its color)
97: savedata = pa.savedata#if True save data to text file
98:
140 99: #sequences consist of a sequence of pulses of rotation angle integer/unit
100: #always along the x-axis, with positive or negative sign (0, 180),
101: #repeated in a supercycle (e.g. for Dipsi2 a full cycle is 4*9= 36 pulses)
102: if mixing=="Dipsi2":
103:     unit = 1
145 104:     Phase = np.array([0,180,0,180,0,180,0,180,0])*(-1./90)+1
105:     Angle = np.array([320,410,290,285,30,245,375,265,370])
106:     SupCyc = np.array([0,180,180,0])*(-1./90)+1
107: if mixing=="Waltz16":
108:     unit = 1
150 109:     Phase = np.array([0,180,0])*(-1./90)+1
110:     Angle = np.array([90,180,270])
111:     SupCyc = np.array([0,0,180,180,180,0,0,180,
112:         180,180,0,0,0,180,180,0])*(-1./90)+1
113: if mixing=="Dipsi20": #to test unit = 10, gives same result a Dipsi2
155 114:     unit = 10
115:     Phase = np.array([0,180,0,180,0,180,0,180,0])*(-1./90)+1
116:     Angle = np.array([3200,4100,2900,2850,300,2450,3750,2650,3700])
117:     SupCyc = np.array([0,180,180,0])*(-1./90)+1
118: if mixing=="Garp":
160 119:     unit = 10
120:     Phase = np.array([0,180,0,180,0,180,0,180,0,180,0,180,0,180,
121:         0,180,0,180,0,180,0,180,0,180,0])*(-1./90)+1
122:     Angle = np.array([305,552,2578,2683,693,622,850,918,1345,2561,
123:         664,459,255,727,1195,1382,2584,649,709,772,
165 124:         982,1336,2559,656,534])
125:     SupCyc = np.array([0,180,180,0])*(-1./90)+1
126: if mixing=="cw":
127:     unit = 1
128:     Phase = np.array([0])*(-1./90)+1
170 129:     Angle = np.array([360*1]) #multiples of 360
130:     SupCyc = np.array([0])*(-1./90)+1
131:

```

```

132:     tau1 = tau90/(90*unit) #duration of 1 step in calculation
133:     w1 = 2*np.pi/(4.*tau90) #rf amplitude
175 134:
135:     H2Oini = np.array([[np.cos(i*2*np.pi/ngrid),np.sin(i*2*np.pi/ngrid),0]
136:                       for i in range(ngrid)]).T #initial condition solvent
137:     dt_sc = tau1*np.sum(Angle)*len(SupCyc) #lenght one supercycle
138:     time = dt_sc*range(maxcyc+1)#time from 0 to end mixing, in super cycle inc.
180 139:     print('Maximum mixing time:',time[-1])
140:
141:     #next 3 lines. Evolution solvent after each supercycle. To a good
142:     #approximation a rotation around the x-axis, with angular freq.=
143:     #-(3/4)*wDF*Mx(0)
185 144:     c = np.cos(-(3/4)*wDF*np.outer(H2Oini[0],time))
145:     s = np.sin(-(3/4)*wDF*np.outer(H2Oini[0],time))
146:     MH2O = np.array([np.outer(H2Oini[0],np.ones(maxcyc+1)),
147:                     np.einsum('i,ij->ij',H2Oini[1],c)-
148:                     np.einsum('i,ij->ij',H2Oini[2],s),
190 149:                     np.einsum('i,ij->ij',H2Oini[2],c)+
150:                     np.einsum('i,ij->ij',H2Oini[1],s)])
151:
152:     MDSS = np.zeros_like(MH2O) #next lines initial MDSS
153:     if iniDSS == "MH2O":
195 154:         MDSS[:, :, 0] = MH2O[:, :, 0].copy()
155:     if iniDSS == "iks":
156:         MDSS[0, :, 0] += 1.0
157:     if iniDSS == "why":
158:         MDSS[1, :, 0] += 1.0
200 159:     if iniDSS == "zed":
160:         MDSS[2, :, 0] += 1.0
161:
162:     rfA = w1*tau1 #rotation angle rf in 1 time-increment
163:     wDSS = tau1*vDSS*B0*2*np.pi #rotation angle offset
205 164:     IA = tau1*wDF #rotation angle wDF/MH2Ox around x-axis
165:     #next two lines, mixing factors for y and z contributions df (makes very
166:     #little difference to add 0.5 or not). This boils down to a precalculation
167:     #of sin and cos factors for MH2O evolution during pulses
168:     cA = tau1*wDF*np.cos((np.arange(max(Angle))+0.5)*np.pi/(180*unit))
210 169:     sA = tau1*wDF*np.sin((np.arange(max(Angle))+0.5)*np.pi/(180*unit))
170:
171:     lA = len(Angle)
172:     lS = len(SupCyc)
173:
215 174:     print('Compilation and parallel calculation starts')
175:     MDSS = evolveDSS(MDSS,ngrid,maxcyc,MH2O,SupCyc,Angle,Phase,IA,sA,

```

```

176:             cA, rfA, wDSS, lA, lS, unit)
177: #plot for different pfgs before acquisition. 'z' corresponds to, spoil-90
178: #before the same pfg.
220 179: c = 0
180: for o in order:
181:     co = np.cos(o*2*np.pi*np.arange(ngrid)/(ngrid))/ngrid
182:     si = np.sin(o*2*np.pi*np.arange(ngrid)/(ngrid))/ngrid
183:     MDSSbuX = co.dot(MDSS[0])-si.dot(MDSS[1])
225 184:     MDSSbuY = co.dot(MDSS[1])+si.dot(MDSS[0])
185:     MDSSbuZx = co.dot(MDSS[2])
186:     MDSSbuZy = si.dot(MDSS[2])
187:     if plot:
188:         if plotopt['plane']:
230 189:             plt.figure('plane')
190:             plt.plot(time,MDSSbuX,color = plotcol[c])
191:             plt.plot(time,MDSSbuY,color = plotcol[c],linestyle='--')
192:         if plotopt['planeabs']:
193:             plt.figure('planeabs')
235 194:             plt.plot(time,np.sqrt(MDSSbuY**2+MDSSbuX**2),color = plotcol[c])
195:         if plotopt['z']:
196:             plt.figure('z')
197:             plt.plot(time,MDSSbuZx,color = plotcol[c])
198:             plt.plot(time,MDSSbuZy,color = plotcol[c],linestyle='--')
240 199:         if plotopt['zabs']:
200:             plt.figure('zabs')
201:             plt.plot(time,np.sqrt(MDSSbuZx**2+MDSSbuZy**2),color = plotcol[c])
202:     c +=1
203:     #can be saved to make own plots, especially to compare
245 204:     if savedata:
205:         np.savetxt('mag'+str(o)+'.txt',[time,MDSSbuX,MDSSbuY,MDSSbuZx,
206:                                     MDSSbuZy])
207:     plt.show()
208: if __name__ == '__main__':
250 209:     main()

```
