# Supplementary material for: Various facets of intermolecular transfer of phase coherence by nuclear dipolar fields
Source: Copernicus journal article supplement (doi:10.5194/mr-2023-11), 2023-08-22
Supplement: Supplementary file [file mr-2023-11-CC1-supplement.pdf]

$$\underline{H} = \int d^3 \underline{r}' \underline{\nabla} \left[ \underline{M}(\underline{r}') \cdot \underline{\nabla} \frac{1}{|\underline{r} - \underline{r}'|} \right] = \underline{\nabla} \Phi$$

$$\frac{1}{|\underline{r} - \underline{r}'|} = \frac{1}{2\pi^2} \int d^3 \underline{k} \frac{1}{k^2} e^{i \underline{k} \cdot (\underline{r} - \underline{r}')}$$

$$\Phi = \frac{1}{2\pi^2} \int d^3 \underline{k} \frac{i \hat{M}(\underline{k}) \cdot \underline{k}}{k^2} e^{i \underline{k} \cdot \underline{r}}$$

$$\underline{H} = \frac{1}{(2\pi)^3} \int d^3 \underline{k} \left\{ -4\pi \frac{\underline{k} (\underline{k} \cdot \hat{M}(\underline{k}))}{k^2} \right\} e^{i \underline{k} \cdot \underline{r}}$$

$$= -\frac{4\pi}{3} \underline{M}(\underline{r}) + \int_{\underline{r} \neq \underline{r}'} d^3 \underline{r}' \frac{3[\underline{M}(\underline{r}') \cdot (\underline{r} - \underline{r}')] (\underline{r} - \underline{r}')}{|\underline{r} - \underline{r}'|^5} - \frac{\underline{M}(\underline{r}')}{|\underline{r} - \underline{r}'|^3}$$

$$\underline{B} = -\underline{\nabla} \times \int d^3 \underline{r}' \underline{M}(\underline{r}') \times \underline{\nabla} \frac{1}{|\underline{r} - \underline{r}'|}$$

$$= \frac{1}{(2\pi)^3} \int d^3 \underline{r}' 4\pi \frac{\underline{k} \times (\hat{M} \times \underline{k})}{k^2} e^{i \underline{k} \cdot \underline{r}}$$

$$= \frac{1}{(2\pi)^3} \int d^3 \underline{r}' 4\pi \left\{ \underline{M} - \frac{\underline{k} (\underline{k} \cdot \hat{M}(\underline{k}))}{k^2} \right\} e^{i \underline{k} \cdot \underline{r}}$$

$$\underline{H} + \frac{4\pi}{3} \underline{M} = \underline{B} - \frac{8\pi}{3} \underline{M} = \int_{\underline{r} \neq \underline{r}'} d^3 \underline{r}' \left[ \text{dipole} \right]$$

- Dipole at origin

$$\frac{3(\underline{M} \cdot \underline{r})\underline{r} - \underline{M}}{r^5} = \frac{1}{r^3} (3(\underline{M} \cdot \hat{\underline{r}})\hat{\underline{r}} - \underline{M})$$

$\underline{M}$  fixed and average over  $\varphi$  with  $\hat{\underline{r}}(\varphi) = R_z(\varphi)\hat{\underline{r}}(0)$

$$\hat{\underline{r}}(\varphi) = (\underline{n} \cdot \hat{\underline{r}})\underline{n} + \cos\varphi (\hat{\underline{r}} - \underline{n}(\underline{n} \cdot \hat{\underline{r}})) - \sin\varphi (\underline{n} \times \hat{\underline{r}})$$

- after LOTS of vector algebra for  $\underline{n} = \underline{e}_z$ !

$$\langle 3(\underline{M} \cdot \hat{\underline{r}})\hat{\underline{r}} - \underline{M} \rangle = \frac{1}{2} (3\hat{r}_z^2 - 1) \left\{ 3M_z \underline{e}_z - \underline{M} \right\}$$

- an easier method

$$\begin{aligned} E &= \frac{1}{r^3} \left\{ 3(\underline{M} \cdot \hat{\underline{r}})(\underline{N} \cdot \hat{\underline{r}}) - \underline{M} \cdot \underline{N} \right\} \\ &= \frac{1}{r^3} \left\{ M_i (3\hat{r}_i \hat{r}_j - \delta_{ij}) N_j \right\} \\ &= \frac{1}{r^3} M_i D_{ij} N_j \end{aligned}$$

tensor notation

- The energy is an invariant, but we can break the symmetry and transform only  $D_{ij}$

$$\langle R_z(\varphi) D_{ij} R_z(-\varphi) \rangle = \begin{pmatrix} \frac{3}{2}(\hat{r}_x^2 + \hat{r}_y^2) - 1 & 0 & 0 \\ 0 & \frac{3}{2}(\hat{r}_x^2 + \hat{r}_y^2) - 1 & 0 \\ 0 & 0 & 3\hat{r}_z^2 - 1 \end{pmatrix}$$

②

# Axial Averaged Dipole

Tom Barbara

• Again, this produces

$$\frac{1}{2} (3 \hat{r}_z^2 - 1) \{ 3 M_z N_z - (\underline{M} \cdot \underline{N}) \}$$

for a general averaging about an axis  $\underline{n}$

$$\frac{1}{2} (3 (\hat{r} \cdot \underline{n})^2 - 1) \{ 3 (\underline{M} \cdot \underline{n}) \underline{n} - \underline{M} \} \quad \star$$

• NB we could also start with

$$\hat{r}_i (3 M_i N_k - (\underline{M} \cdot \underline{N}) \delta_{ik}) r_k$$

and apply the same trick.

• We can now apply this to the Fourier transform pair

$$\frac{1}{(2\pi)^3} \int d\underline{k} e^{i \underline{k} \cdot \underline{r}} 4\pi \left\{ \frac{(\underline{k} \cdot \hat{M}(\underline{k})) \underline{k}}{\underline{k} \cdot \underline{k}} \right\} = \frac{4\pi}{3} \underline{M}(\underline{r})$$

$$+ \int d^3 \underline{r}' \left\{ \frac{\underline{M}(\underline{r}')}{|\underline{r} - \underline{r}'|^3} - \frac{3(\underline{r} - \underline{r}') [\underline{M}(\underline{r}') \cdot (\underline{r} - \underline{r}')] }{|\underline{r} - \underline{r}'|^5} \right\}$$

to obtain

$$\frac{1}{(2\pi)^3} \int d\underline{k} e^{i \underline{k} \cdot \underline{r}} \frac{4\pi}{3} \frac{1}{2} \left( 3 \frac{k_z^2}{k^2} - 1 \right) \left( 3 \hat{M}_z(\underline{k}) e_{\underline{z}} - \hat{\underline{M}}(\underline{k}) \right)$$

$$= \int d^3 \underline{r}' \frac{-\frac{1}{2} (3 r_z^2 - 1)}{|\underline{r} - \underline{r}'|^3} \left\{ 3 M_z(\underline{r}') e_{\underline{z}} - \underline{M}(\underline{r}') \right\}$$

★ This trick can also be used for the expression in  $\underline{k}$  space
